# Supplementary material for: Electrocatalytic activity of Mn/Cu doped Fe2O3–PANI–rGO composites for fuel cell applications
Source: Royal Society of Chemistry journal article supplement (doi:10.1039/c5ra06712j), 2015-01-01
Supplement: c5ra06712j1.pdf [file c5ra06712j1.pdf]

## Electrocatalytic activity of Mn/Cu doped $\text{Fe}_2\text{O}_3$ -PANI-rGO composites for Fuel cell applications

Karuppannan Mohanraju, Louis Cindrella\*

Fuel Cell lab, Department of Chemistry, National Institute of Technology, Tiruchirappalli-  
620015, India.

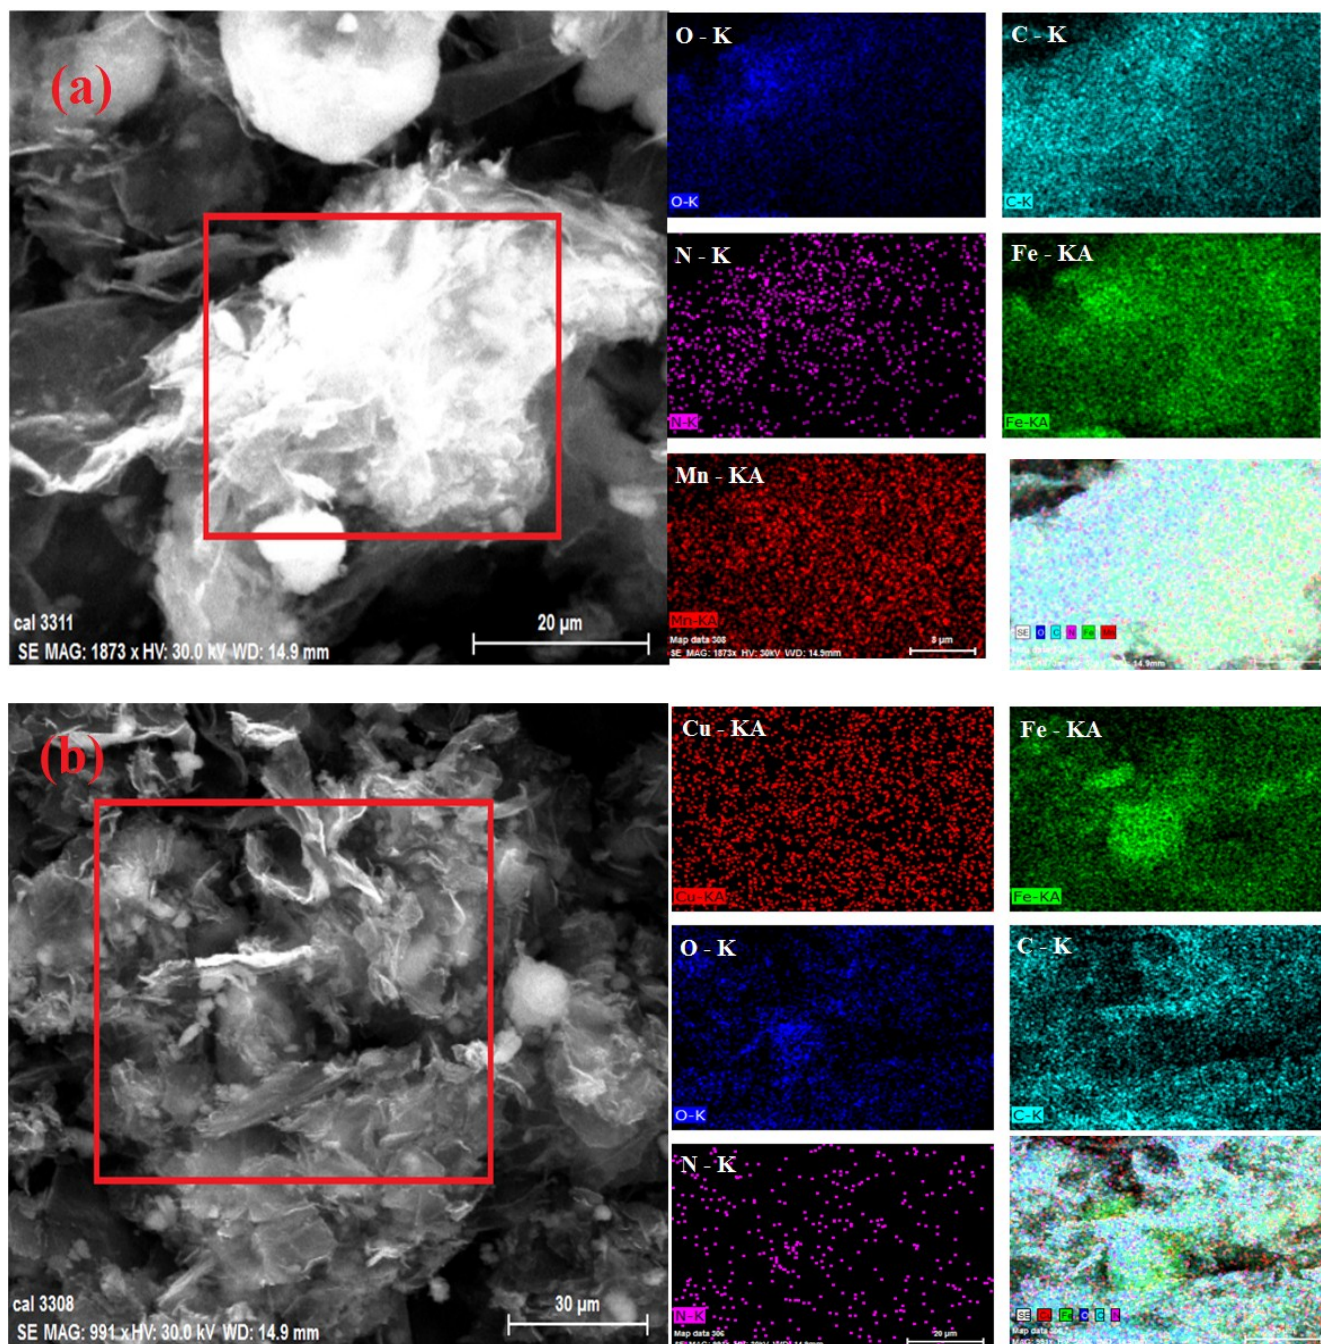

Fig. S1. Elemental mapping of Mn doped  $\text{Fe}_2\text{O}_3$ -PANI-rGO (a), Cu doped  $\text{Fe}_2\text{O}_3$ -PANI-rGO (b) composites.

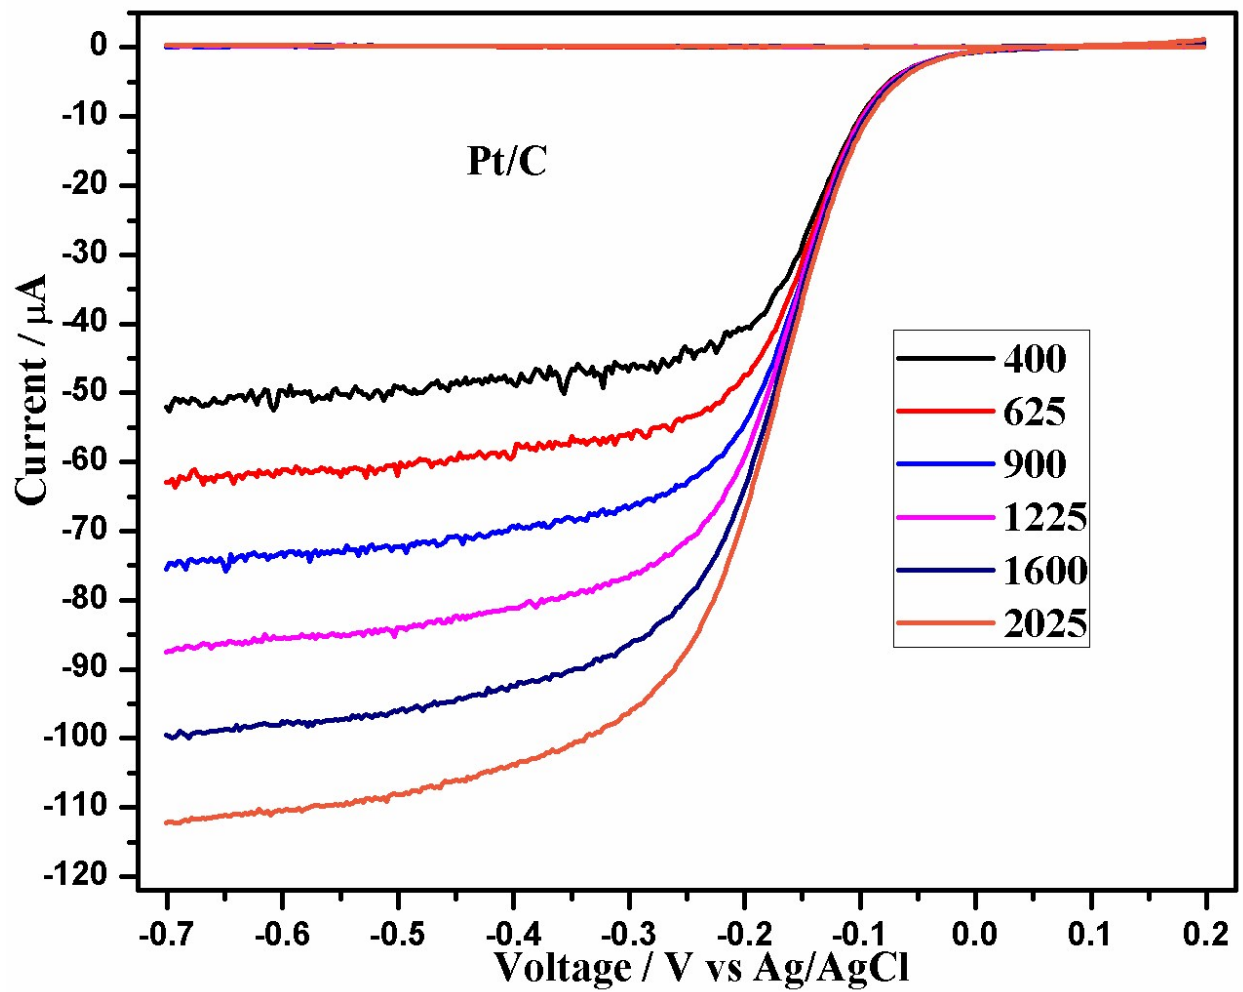

Fig. S2. Rotating ring disc voltammograms of Pt/C electrodes in  $\text{O}_2$ -saturated 0.1 M KOH at a scan rate of  $10 \text{ mV s}^{-1}$  recorded at various rotation rates.

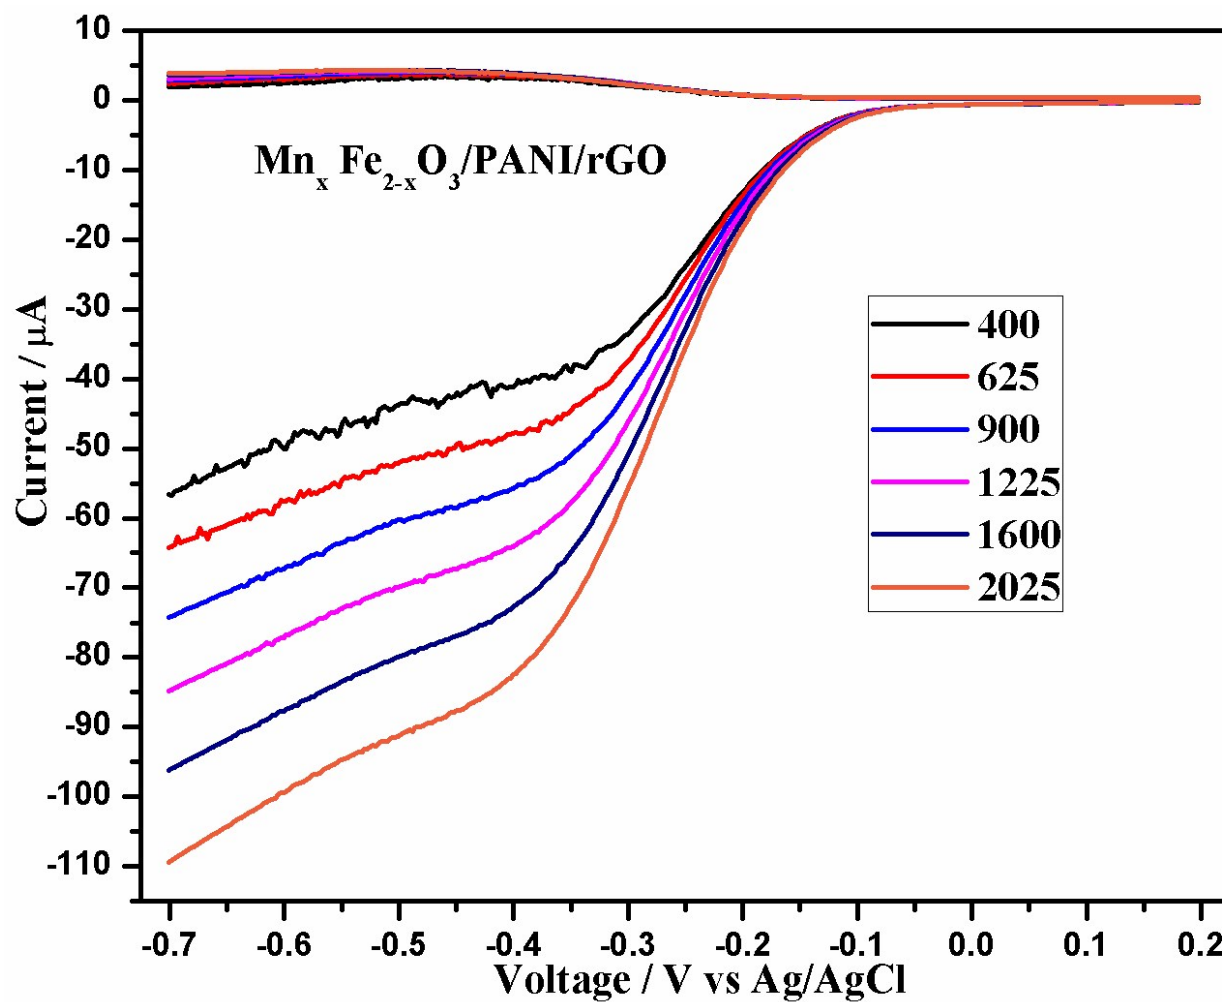

Fig. S3. Rotating ring disc voltammograms of Mn doped  $\text{Fe}_2\text{O}_3$ -PANI-rGO electrodes in  $\text{O}_2$ -saturated 0.1 M KOH at a scan rate of  $10 \text{ mV s}^{-1}$  recorded at various rotation rates.

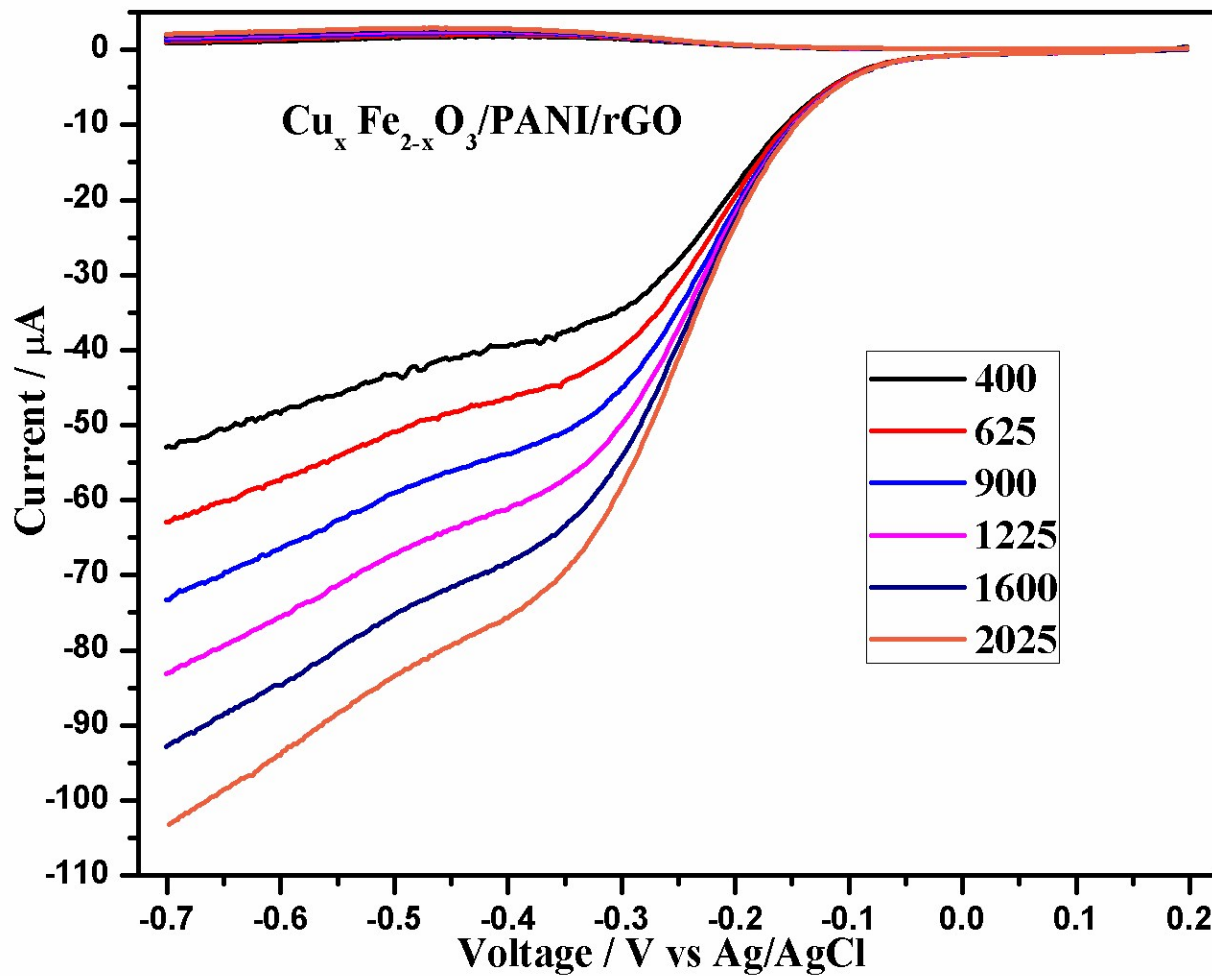

Fig. S4. Rotating ring disc voltammograms of Cu doped  $\text{Fe}_2\text{O}_3$ -PANI-rGO electrodes in  $\text{O}_2$ -saturated 0.1 M KOH at a scan rate of  $10 \text{ mV s}^{-1}$  recorded at various rotation rates.

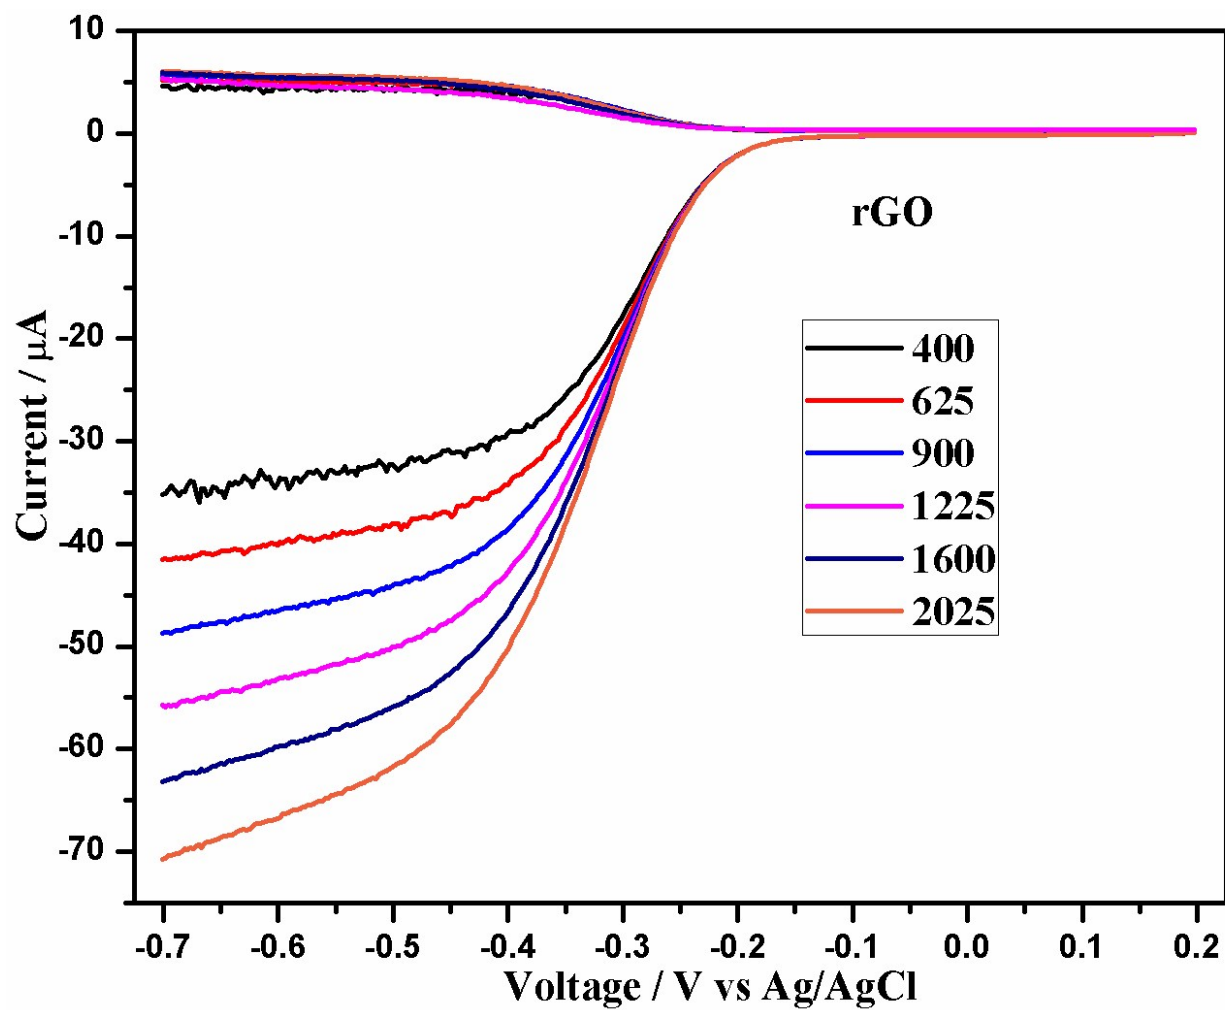

Fig. S5. Rotating ring disc voltammograms of rGO electrodes in  $\text{O}_2$ -saturated 0.1 M KOH at a scan rate of  $10 \text{ mV s}^{-1}$  recorded at various rotation rates.
